# Supplementary material for: Electrochemiluminescence behaviors of Eu3+-doped CdS nanocrystals film in aqueous solution
Source: Royal Society of Chemistry journal article supplement (doi:10.1039/c1nr11470k), 2011-12-21
Supplement: c1nr11470k.pdf [file c1nr11470k.pdf]

## Supporting Information

### Electrochemiluminescence Behaviors of $\text{Eu}^{3+}$ -Doped CdS Nanocrystals Film in Aqueous Solution

Li Deng<sup>a</sup>, Yun Shan<sup>a,b</sup>, Jing-Juan Xu<sup>\*a</sup>, Hong-Yuan Chen<sup>a</sup>

*a* Key Laboratory of Analytical Chemistry for Life Science, School of Chemistry and Chemical Engineering, Nanjing University, Nanjing 210093, P. R. China.

*b* School of Biochemical and Environmental Engineering, Nanjing Xiaozhuang University, Nanjing 211171, P. R. China.

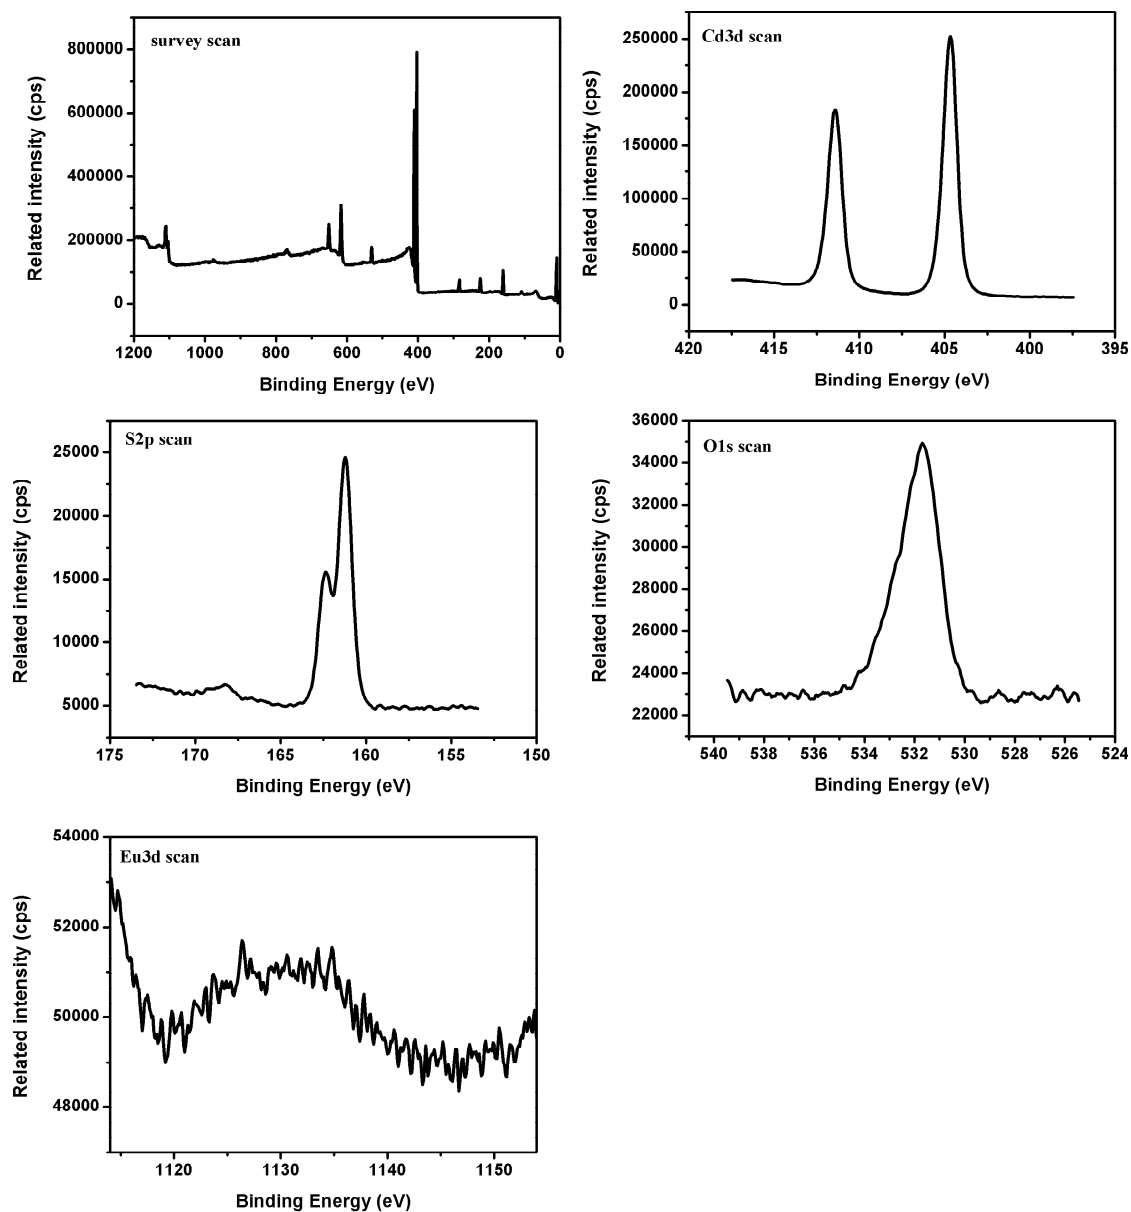

Figure S1. XPS spectrum of CdS:Eu NCs (doping percent: 1.5%).

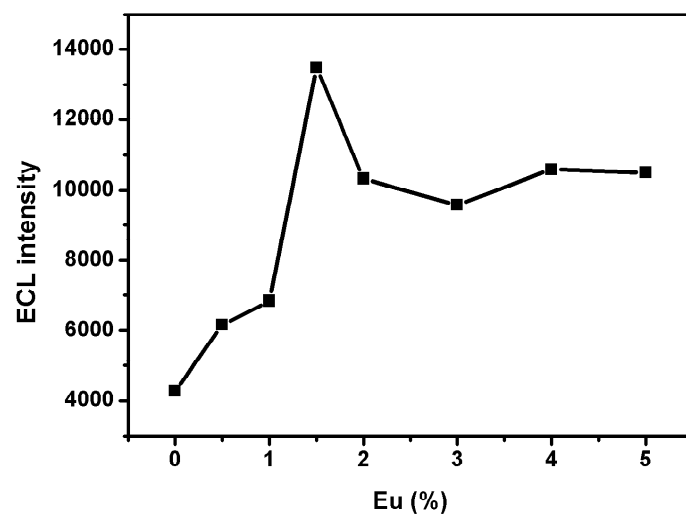

Figure S2. Effect of Eu<sup>3+</sup> doping level in CdS NCs on ECL emission in air-saturated 0.10 M pH 9.0 PBS.
